# Supplementary material
Source: PubMed Central journal article supplement (PMC3071020)
Supplement: NIHMS280315-supplement-1_si_001.pdf [file NIHMS280315-supplement-1_si_001.pdf]

## Supporting Information

### Immobilization of Amphiphilic Polycations by Catechol Functionality for Antimicrobial Coatings

Hua Han<sup>1</sup>, Jianfeng Wu<sup>2</sup>, Christopher W. Avery<sup>3</sup>, Masato Mizutani<sup>4</sup>, Xiaoming Jiang<sup>1</sup>, Masami Kamigaito<sup>4</sup>, Zhan Chen<sup>3</sup>, Chuanwu Xi<sup>2</sup>, Kenichi Kuroda<sup>1,3\*</sup>

<sup>1</sup>Department of Biologic and Materials Sciences, University of Michigan School of Dentistry, Ann Arbor, MI, 48109

<sup>2</sup>Department of Environmental Health Sciences, University of Michigan School of Public Health, Ann Arbor, MI, 48109

<sup>3</sup>Department of Chemistry, University of Michigan School of Dentistry, Ann Arbor, MI, 48109

<sup>4</sup>Department of Applied Chemistry, Graduate School of Engineering, Nagoya University, Furo-cho, Chikusa-ku, Nagoya 464-8603, Japan

1. Synthesis of DMA (catechol) monomer
2. Synthesis of cationic monomer DMAEMAC<sub>12</sub>
3. <sup>1</sup>H NMR characterization of polymers
4. Molecular weight determination of polymers
5. SFG spectra of P1-4 coatings wet by water and after removal of water
6. Antimicrobial activity of polymers in solution: MIC determination
7. Antimicrobial activity of polymers leached from coatings
8. <sup>1</sup>H NMR characterization of leached polymers
9. Killing ability of polymer coatings
10. Determination of zone of inhibition

### S. 1. DMA synthesis (Lee et al. <sup>1</sup>)

NaHCO<sub>3</sub> (1.6g, 19.0 mmol) and Na<sub>2</sub>B<sub>4</sub>O<sub>7</sub> (4g, 10.5 mmol) were dissolved in H<sub>2</sub>O (50 mL) under N<sub>2</sub>. Dopamine-HCl (2g, 10.5 mmol) was added into aqueous solution, and then methacrylate anhydride (1.9 mL, 11.6 mmol) in THF (10 mL) was then added dropwise. NaOH aq (1M) was added so that the pH was kept above 8, and the mixture was stirred overnight with N<sub>2</sub> bubbling. The pH of the aqueous solution was adjusted to 2 and extracted with ethyl acetate (100 mL) three times. The combined organic layer was dried over MgSO<sub>4</sub>. After removing the solvent under reduced pressure, the solution was added into hexane (100 mL) and then stored at 4 °C overnight. The gray precipitate was filtered and washed with hexane. (1.6 g, 68.9% yield). <sup>1</sup>H NMR (Inova, 400MHz, DMSO-*D*<sub>6</sub>) δ 6.64 (d, 1H, C<sub>6</sub>H<sub>2</sub>H(OH)<sub>2</sub>-), 6.61 (s, 1H, C<sub>6</sub>H<sub>2</sub>H(OH)<sub>2</sub>), 6.42 (d, 1H, C<sub>6</sub>H<sub>2</sub>H(OH)<sub>2</sub>-), 5.60 (s, 1H, -C(=O)-C(-CH<sub>3</sub>)=CH<sub>2</sub>), 5.29 (s, 1H, -C(=O)-C(-CH<sub>3</sub>)=CH<sub>2</sub>), 3.22 (q, 2H, C<sub>6</sub>H<sub>3</sub>(OH)<sub>2</sub>-CH<sub>2</sub>-CH<sub>2</sub>(NH)-C(=O)-), 2.58(t, 2H, C<sub>6</sub>H<sub>3</sub>(OH)<sub>2</sub>-CH<sub>2</sub>-CH<sub>2</sub>(NH)-C(=O)-), 1.83 (s, 3H, -C(=O)-C(-CH<sub>3</sub>)=CH<sub>2</sub>).

### S. 2. Synthesis of cationic monomer DMAEMAC<sub>12</sub> (Ravikumar et al. <sup>2</sup>)

2-(Dimethylamino)ethyl methacrylate DMAEMA (10.8 mL, 62.7 mmol) was added to 1-bromododecane C<sub>12</sub>H<sub>25</sub>Br (17.5 mL, 70.7 mmol) in a mixture of acetonitrile (50 mL) and chloroform (25 mL). The mixture was stirred at 40 °C overnight under N<sub>2</sub>. The solvent was removed under reduced pressure. Diethyl ether was added to the remaining oily product, giving precipitate. This precipitate was collected by filtration and recrystallized from a mixture of diethyl ether and acetonitrile. (20.8 g, 81.5% yield). <sup>1</sup>H NMR (400MHz, CD<sub>3</sub>OD) δ 6.12 (s, 1H, -C(-CH<sub>3</sub>)=CH<sub>2</sub>), 5.62 (s, 1H, -C(-CH<sub>3</sub>)=CH<sub>2</sub>), 4.58 (m,

2H, -N-CH<sub>2</sub>-CH<sub>2</sub>-C(=O)-), 3.66 (m, 2H, -N-CH<sub>2</sub>-CH<sub>2</sub>-C(=O)-), 3.38 (m, 2H, CH<sub>3</sub>(CH<sub>2</sub>)<sub>10</sub>-CH<sub>2</sub>-(CH<sub>3</sub>)<sub>2</sub>-N<sup>+</sup>-CH<sub>2</sub>-CH<sub>2</sub>-C(=O)-), 3.15 (s, 6H, CH<sub>3</sub>(CH<sub>2</sub>)<sub>10</sub>-CH<sub>2</sub>-(CH<sub>3</sub>)<sub>2</sub>-N<sup>+</sup>), 1.90 (s, 3H, -C(-CH<sub>3</sub>)=CH<sub>2</sub>), 1.76 (m, 2H, CH<sub>3</sub>(CH<sub>2</sub>)<sub>9</sub>-CH<sub>2</sub>-CH<sub>2</sub>-(CH<sub>3</sub>)<sub>2</sub>-N<sup>+</sup>), 1.29 (br, 18H, CH<sub>3</sub>(CH<sub>2</sub>)<sub>9</sub>-CH<sub>2</sub>-CH<sub>2</sub>-(CH<sub>3</sub>)<sub>2</sub>-N<sup>+</sup>), 0.80 (t, 3H, CH<sub>3</sub>(CH<sub>2</sub>)<sub>11</sub>-(CH<sub>3</sub>)<sub>2</sub>-N<sup>+</sup>).

### S.3. <sup>1</sup>H NMR characterization of polymers

<sup>1</sup>H NMR (400MHz, CD<sub>3</sub>OD) for the copolymer P0 (11% DMA, 89% MEA, 69% yield): δ 6.7- 6.8 (br, 2H, C<sub>6</sub>H<sub>2</sub>H(OH)<sub>2</sub>-), 6.58 (d, 1H, C<sub>6</sub>H<sub>2</sub>H(OH)<sub>2</sub>-), 4.21 (br, 2H, CH<sub>3</sub>-O-CH<sub>2</sub>-CH<sub>2</sub>-O-C(=O)-), 3.56 (br, 2H, CH<sub>3</sub>-O-CH<sub>2</sub>-CH<sub>2</sub>-O-C(=O)-), 3.35 (s, 2H, CH<sub>3</sub>-O-CH<sub>2</sub>-CH<sub>2</sub>-O-C(=O)-), 2.69 (s, 2H, C<sub>6</sub>H<sub>3</sub>(OH)<sub>2</sub>-CH<sub>2</sub>-CH<sub>2</sub>(NH)-C(=O)-), 2.39 (s, 1H, -O-C(=O)-CH(-CH<sub>2</sub>)-CH<sub>2</sub>-), 2.22(br, 2H, C<sub>6</sub>H<sub>3</sub>(OH)<sub>2</sub>-CH<sub>2</sub>-CH<sub>2</sub>(NH)-C(=O)-), 1.90 (s, 3H, -C(=O)-C(-CH<sub>3</sub>)-CH<sub>2</sub>-), 1.68 (m, 2H, -O-C(=O)-CH(-CH<sub>2</sub>)-CH<sub>2</sub>-), 0.98 (m, 2H, -C(=O)-C(-CH<sub>3</sub>)-CH<sub>2</sub>-).

<sup>1</sup>H NMR (400MHz, CD<sub>3</sub>OD) for the copolymer P1 (12% DMA, 72% MEA, 16% DMAEMAC<sub>12</sub>, 70% yield): δ 6.7- 6.8 (br, 2H, C<sub>6</sub>H<sub>2</sub>H(OH)<sub>2</sub>-; 1H, C<sub>6</sub>H<sub>2</sub>H(OH)<sub>2</sub>-), 4.40 (br, 2H, -N-CH<sub>2</sub>-CH<sub>2</sub>-C(=O)-, 2H, -N-CH<sub>2</sub>-CH<sub>2</sub>-C(=O)-), 3.80 (br, 2H, CH<sub>3</sub>(CH<sub>2</sub>)<sub>10</sub>-CH<sub>2</sub>-(CH<sub>3</sub>)<sub>2</sub>-N<sup>+</sup>-CH<sub>2</sub>-CH<sub>2</sub>-C(=O)-), 4.20-3.80 (br, 2H, CH<sub>3</sub>-O-CH<sub>2</sub>-CH<sub>2</sub>-O-C(=O)-; 2H, CH<sub>3</sub>-O-CH<sub>2</sub>-CH<sub>2</sub>-O-C(=O)-), 3.60 (s, 6H, CH<sub>3</sub>(CH<sub>2</sub>)<sub>10</sub>-CH<sub>2</sub>-(CH<sub>3</sub>)<sub>2</sub>-N<sup>+</sup>), 3.42 (s, 2H, CH<sub>3</sub>-O-CH<sub>2</sub>-CH<sub>2</sub>-O-C(=O)-), 2.60 (s, 2H, C<sub>6</sub>H<sub>3</sub>(OH)<sub>2</sub>-CH<sub>2</sub>-CH<sub>2</sub>(NH)-C(=O)-), 2.40 (s, 1H, -O-C(=O)-CH(-CH<sub>2</sub>)-CH<sub>2</sub>-), 2.20(br, 2H, C<sub>6</sub>H<sub>3</sub>(OH)<sub>2</sub>-CH<sub>2</sub>-CH<sub>2</sub>(NH)-C(=O)-), 1.90 (br, -C(=O)-C(-CH<sub>3</sub>)-CH<sub>2</sub>-), 1.68 (br, -O-C(=O)-CH(-CH<sub>2</sub>)-CH<sub>2</sub>-), 1.10-1.45 (br, 20H, CH<sub>3</sub>(CH<sub>2</sub>)<sub>10</sub>-CH<sub>2</sub>-(CH<sub>3</sub>)<sub>2</sub>-N<sup>+</sup>), 0.80 (br, -C(=O)-C(-CH<sub>3</sub>)-CH<sub>2</sub>-).

**<sup>1</sup>H NMR (400MHz, CD<sub>3</sub>OD) for the copolymer P3** (13% DMA, 31% MEA, 56% DMAEMAC<sub>12</sub>, 72% yield): δ 6.6- 6.8 (br, 2H, C<sub>6</sub>H<sub>2</sub>H(OH)<sub>2</sub>-; 1H, C<sub>6</sub>H<sub>2</sub>H(OH)<sub>2</sub>-), 4.50 (br, 2H, -N-CH<sub>2</sub>-CH<sub>2</sub>-C(=O)-, 2H, -N-CH<sub>2</sub>-CH<sub>2</sub>-C(=O)-), 3.85 (br, 2H, CH<sub>3</sub>(CH<sub>2</sub>)<sub>10</sub>-CH<sub>2</sub>-(CH<sub>3</sub>)<sub>2</sub>-N<sup>+</sup>-CH<sub>2</sub>-CH<sub>2</sub>-C(=O)-), 4.20-3.80 (br, 2H, CH<sub>3</sub>-O-CH<sub>2</sub>-CH<sub>2</sub>-O-C(=O)-; 2H, CH<sub>3</sub>-O-CH<sub>2</sub>-CH<sub>2</sub>-O-C(=O)-), 3.60 (s, 6H, CH<sub>3</sub>(CH<sub>2</sub>)<sub>10</sub>-CH<sub>2</sub>-(CH<sub>3</sub>)<sub>2</sub>-N<sup>+</sup>), 3.30 (s, 2H, CH<sub>3</sub>-O-CH<sub>2</sub>-CH<sub>2</sub>-O-C(=O)-), 2.70 (s, 2H, C<sub>6</sub>H<sub>3</sub>(OH)<sub>2</sub>-CH<sub>2</sub>-CH<sub>2</sub>(NH)-C(=O)-), 2.10 (br, 1H, -O-C(=O)-CH(-CH<sub>2</sub>)-CH<sub>2</sub>-), 2.20(br, 2H, C<sub>6</sub>H<sub>3</sub>(OH)<sub>2</sub>-CH<sub>2</sub>-CH<sub>2</sub>(NH)-C(=O)-), 1.80-1.90 (br, -C(=O)-C(-CH<sub>3</sub>)-CH<sub>2</sub>-); -O-C(=O)-CH(-CH<sub>2</sub>)-CH<sub>2</sub>-), 1.20-1.45 (br, 20H, CH<sub>3</sub>(CH<sub>2</sub>)<sub>10</sub>-CH<sub>2</sub>-(CH<sub>3</sub>)<sub>2</sub>-N<sup>+</sup>), 0.90 (br, -C(=O)-C(-CH<sub>3</sub>)-CH<sub>2</sub>-).

**<sup>1</sup>H NMR (400MHz, CD<sub>3</sub>OD) for the copolymer P4** (12% DMA, 88% DMAEMAC<sub>12</sub>, 80% yield): δ 6.5- 6.8 (br, 2H, C<sub>6</sub>H<sub>2</sub>H(OH)<sub>2</sub>-; 1H, C<sub>6</sub>H<sub>2</sub>H(OH)<sub>2</sub>-), 4.40 (br, 2H, -N-CH<sub>2</sub>-CH<sub>2</sub>-C(=O)-, 2H, -N-CH<sub>2</sub>-CH<sub>2</sub>-C(=O)-), 3.85 (br, 2H, CH<sub>3</sub>(CH<sub>2</sub>)<sub>10</sub>-CH<sub>2</sub>-(CH<sub>3</sub>)<sub>2</sub>-N<sup>+</sup>-CH<sub>2</sub>-CH<sub>2</sub>-C(=O)-), 3.55 (s, 6H, CH<sub>3</sub>(CH<sub>2</sub>)<sub>10</sub>-CH<sub>2</sub>-(CH<sub>3</sub>)<sub>2</sub>-N<sup>+</sup>), 2.70 (br, 2H, C<sub>6</sub>H<sub>3</sub>(OH)<sub>2</sub>-CH<sub>2</sub>-CH<sub>2</sub>(NH)-C(=O)-), 2.20(br, 2H, C<sub>6</sub>H<sub>3</sub>(OH)<sub>2</sub>-CH<sub>2</sub>-CH<sub>2</sub>(NH)-C(=O)-), 1.80-1.90 (br, -C(=O)-C(-CH<sub>3</sub>)-CH<sub>2</sub>-); -O-C(=O)-CH(-CH<sub>2</sub>)-CH<sub>2</sub>-), 1.20-1.45 (br, 20H, CH<sub>3</sub>(CH<sub>2</sub>)<sub>10</sub>-CH<sub>2</sub>-(CH<sub>3</sub>)<sub>2</sub>-N<sup>+</sup>), 0.90 (br, -C(=O)-C(-CH<sub>3</sub>)-CH<sub>2</sub>-).

**<sup>1</sup>H NMR (400MHz, CD<sub>3</sub>OD) for the copolymer P5** (73% MEA, 27% DMAEMAC<sub>12</sub>, 79% yield): δ 4.20 (br, 2H, -N-CH<sub>2</sub>-CH<sub>2</sub>-C(=O)-), 3.78 (br, 2H, -N-CH<sub>2</sub>-CH<sub>2</sub>-C(=O)-), 3.58 (br, 2H, CH<sub>3</sub>(CH<sub>2</sub>)<sub>10</sub>-CH<sub>2</sub>-(CH<sub>3</sub>)<sub>2</sub>-N<sup>+</sup>-CH<sub>2</sub>-CH<sub>2</sub>-C(=O)-), 3.30 (s, 6H, CH<sub>3</sub>(CH<sub>2</sub>)<sub>10</sub>-CH<sub>2</sub>-(CH<sub>3</sub>)<sub>2</sub>-N<sup>+</sup>), 2.30-2.50 (br, 1H, -O-C(=O)-CH(-CH<sub>2</sub>)-CH<sub>2</sub>-), 1.80 (br, 2H, -C(=O)-C(-CH<sub>3</sub>)-CH<sub>2</sub>-), 1.20-1.30 (br, 18H, CH<sub>3</sub>(CH<sub>2</sub>)<sub>10</sub>-CH<sub>2</sub>-(CH<sub>3</sub>)<sub>2</sub>-N<sup>+</sup>), 0.85 (br, 3H, -C(=O)-C(-CH<sub>3</sub>)-CH<sub>2</sub>-).

**<sup>1</sup>H NMR (400MHz, CD<sub>3</sub>OD) for the copolymer P7** (26% MEA, 74% DMAEMAC<sub>12</sub>, 77% yield): δ4.40 (br, 2H, -N-CH<sub>2</sub>-CH<sub>2</sub>-C(=O)-), 3.70 (br, 2H, -N-CH<sub>2</sub>-CH<sub>2</sub>-C(=O)-), 3.52 (br, 2H, CH<sub>3</sub>(CH<sub>2</sub>)<sub>10</sub>-CH<sub>2</sub>-(CH<sub>3</sub>)<sub>2</sub>-N<sup>+</sup>-CH<sub>2</sub>-CH<sub>2</sub>-C(=O)-), 3.30 (s, 6H, CH<sub>3</sub>(CH<sub>2</sub>)<sub>10</sub>-CH<sub>2</sub>-(CH<sub>3</sub>)<sub>2</sub>-N<sup>+</sup>), 2.20 (br, 1H, -O-C(=O)-CH(-CH<sub>2</sub>)-CH<sub>2</sub>-), 1.80 (br, 2H, -C(=O)-C(-CH<sub>3</sub>)-CH<sub>2</sub>-), 1.20-1.30 (br, 18H, CH<sub>3</sub>(CH<sub>2</sub>)<sub>10</sub>-CH<sub>2</sub>-(CH<sub>3</sub>)<sub>2</sub>-N<sup>+</sup>), 0.85 (br, 3H, -C(=O)-C(-CH<sub>3</sub>)-CH<sub>2</sub>-).

**<sup>1</sup>H NMR (400MHz, CD<sub>3</sub>OD) for the copolymer P8** (100% DMAEMAC<sub>12</sub>, 80% yield): δ4.50 (br, 2H, -N-CH<sub>2</sub>-CH<sub>2</sub>-C(=O)-), 3.90 (br, 2H, -N-CH<sub>2</sub>-CH<sub>2</sub>-C(=O)-), 3.60 (br, 2H, CH<sub>3</sub>(CH<sub>2</sub>)<sub>10</sub>-CH<sub>2</sub>-(CH<sub>3</sub>)<sub>2</sub>-N<sup>+</sup>-CH<sub>2</sub>-CH<sub>2</sub>-C(=O)-), 3.39 (s, 6H, CH<sub>3</sub>(CH<sub>2</sub>)<sub>10</sub>-CH<sub>2</sub>-(CH<sub>3</sub>)<sub>2</sub>-N<sup>+</sup>), 1.80 (br, 2H, -C(=O)-C(-CH<sub>3</sub>)-CH<sub>2</sub>-), 1.20-1.40 (br, 18H, CH<sub>3</sub>(CH<sub>2</sub>)<sub>10</sub>-CH<sub>2</sub>-(CH<sub>3</sub>)<sub>2</sub>-N<sup>+</sup>), 0.85 (br, 3H, -C(=O)-C(-CH<sub>3</sub>)-CH<sub>2</sub>-)

#### S. 4. Molecular weight determination of polymers

**Acid hydrolysis of P1-P4.** A portion of the polymer (10 mg) was dispersed in acetic acid (2.0 mL) containing hydrochloric acid (1 M; 1.0 mL) and heated for 1 day at 90 °C. After cooling to room temperature, the sample was concentrated under reduced pressure.

**Alkaline hydrolysis of P5-P8.** A portion of the polymer (100 mg) was dispersed in deionized water (1.0 mL) containing NaOH (100 mg) and heated for 2 days at 90 °C. After cooling to room temperature, the solution was acidified by addition of hydrochloric acid. The sample was concentrated under reduced pressure.

**GPC.** The crude polymer after hydrolysis was dissolved in THF and filtered through a 0.45 micron syringe filter. Gel permeation chromatography (GPC) was carried out using a Waters 440 GPC, a Wyatt Optilab Refractive Index detector, and Waters' Millennium software for GPC data acquisition and processing with an HT-4, HT-3, and HT-2 3

columns placed in series. The molecular weights were determined relative to narrow molecular weight polystyrene standard.

**Table S1.** Molecular weight of polymers

| Polymer      | Molecular weight of hydrolyzed polymer |                            | PDI | Hydrolysis condition |
|--------------|----------------------------------------|----------------------------|-----|----------------------|
|              | $M_n$<br>( $\times 10^3$ )             | $M_w$<br>( $\times 10^3$ ) |     |                      |
| w/catechol   |                                        |                            |     |                      |
| P1           | 39                                     | 77                         | 2.0 | acid                 |
| P2           | 30                                     | 89                         | 2.9 | acid                 |
| P3           | 28                                     | 76                         | 2.7 | acid                 |
| P4           | 30                                     | 81                         | 2.7 | acid                 |
| w/o catechol |                                        |                            |     |                      |
| P5           | 30                                     | 97                         | 3.3 | base                 |
| P6           | 20                                     | 69                         | 3.4 | base                 |
| P7           | 28                                     | 90                         | 3.3 | base                 |
| P8           | 33                                     | 89                         | 2.7 | base                 |

**S. 5. SFG spectra of P1-4 coatings wet by water and after removal of water**

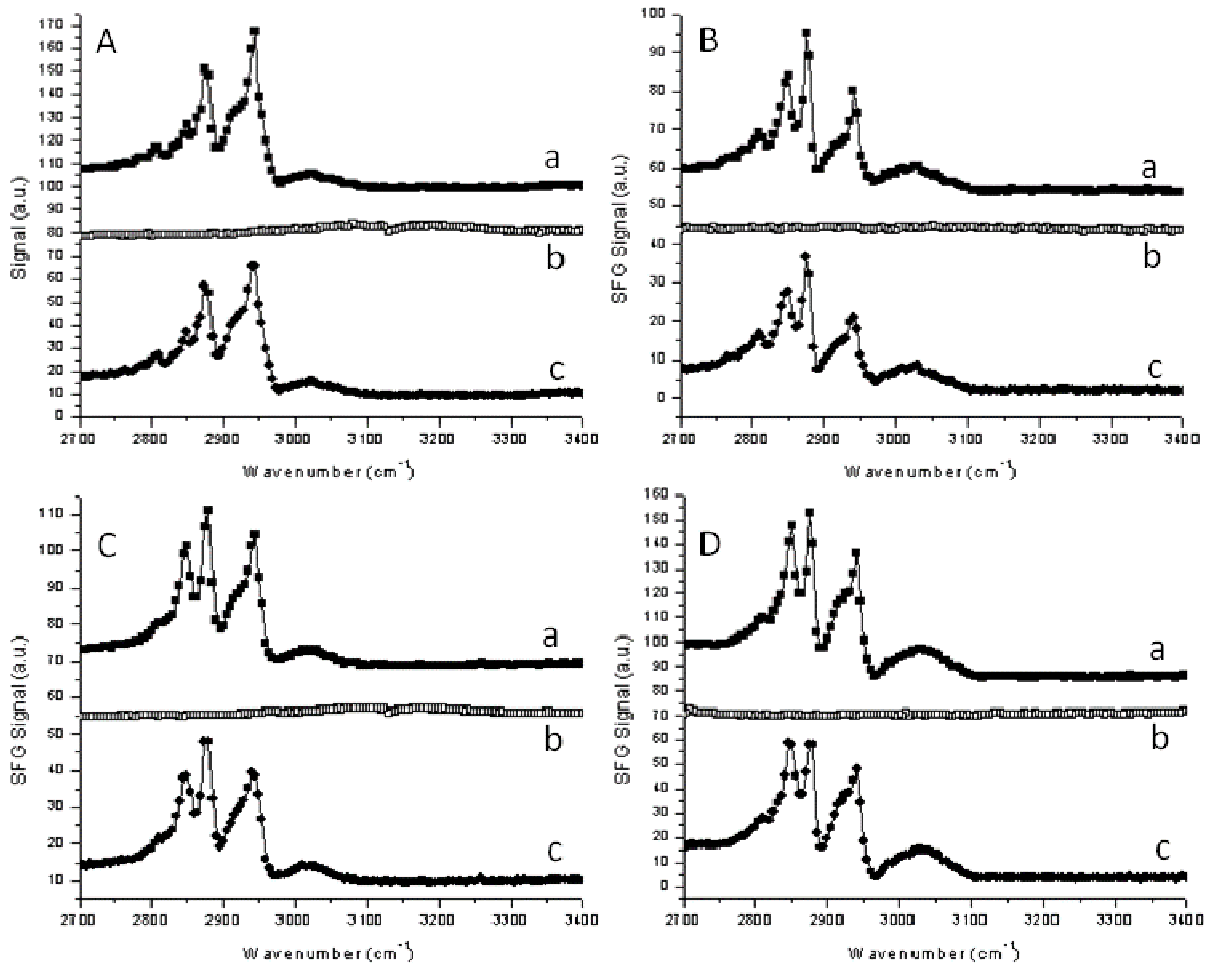

**Figure S1.** SFG spectra of P1 (A), P2 (B), P3 (C), and P4 (D). a) in air; b) in contact with water; and c) in air, after removal from water contact.

### S. 6. Antimicrobial activity of polymers in solution: MIC determination

Antimicrobial activity of polymer coatings was determined by a modified standard protocol: *ASTM E2149-01 Standard Test Method for Determining the Antimicrobial Activity of Immobilized Agents Under Dynamic Contact Conditions*.<sup>3,4</sup> The *E. coli* ATCC 25922 or *S. aureus* ATCC 25923 was grown in Mueller-Hinton (MH) broth (5 mL, pH 7.4) at 37°C overnight. The cell culture was diluted with MH broth to give  $OD_{600} = 0.1$ , which was incubated at 37°C with orbital rotation at 200 rpm for 90 minutes for *E. coli* or 140 minutes for *S. aureus*. The bacterial culture in the mid-logarithmic phase ( $OD_{600} =$

0.5-0.6) was diluted to  $OD_{600} = 0.1$  by MH broth, and further diluted by Phosphate Buffer Saline (PBS, pH 7.4, without calcium and magnesium) serially ( $OD_{600} = \sim 0.001$ , corresponding to  $\sim 2 \times 10^5$  CFU/mL). The polymer-coated glass slides were completely immersed into this bacterial suspension (5mL) in a sterile 15 mL conical tube at 37°C for 1 hr. A non-coated glass slide was used as a control. An aliquot of the bacterial sample solution (100 $\mu$ L) was diluted serially, plated on the agar plates, and incubated at 37°C overnight to count the number of bacterial colonies. Three samples for the polymer coating or control glass slide were tested, each in triplicate, and three independent experiments were performed. The average numbers of viable cells (colony-forming unit, cfu) in solution and standard deviations were calculated from the results of all experiments.

**Table S2.** Antimicrobial activity of polymers in solution

| Polymer | MIC ( $\mu$ g/mL) <sup>a)</sup> |                  |
|---------|---------------------------------|------------------|
|         | <i>E. coli</i>                  | <i>S. aureus</i> |
| P1      | < 7.8                           | 500              |
| P2      | < 7.8                           | 125              |
| P3      | < 7.8                           | 250              |
| P4      | < 7.8                           | 500              |
| P5      | < 7.8                           | 62.3             |
| P6      | < 7.8                           | 62.3             |
| P7      | < 7.8                           | 250              |
| P8      | < 7.8                           | 500              |

a) the assay media contained 5%DMSO.



### S.7. Antimicrobial activity of polymers leached from coatings

Polymer-coated glass slides were incubated with 5 mL of PBS (pH 7.4, without calcium and magnesium) in a sterile 15 mL Falcon tube at 37°C with orbital rotation at 200 rpm for 1 hour. An untreated glass slide was used as a control. The PBS solution (4.5 mL) was removed from each Falcon tube and added to another tube containing *E. coli* fresh culture (0.5mL, OD<sub>600</sub> = ~0.01, corresponding to ~2×10<sup>6</sup> cfu/mL), then incubated at 37°C for 1 hour. The bacterial suspension was diluted serially, plated on Mueller-Hinton (MH) agar plates, and incubated at 37°C overnight.

**Table S3.** Antimicrobial effects of leachables from coatings

| Sample solution <sup>a)</sup> | viable <i>E. coli</i> cells<br>(x10 <sup>5</sup> cfu) |
|-------------------------------|-------------------------------------------------------|
| Control <sup>b)</sup>         | 3.4±0.6                                               |
| w/catechol                    |                                                       |
| P1                            | 3.8±0.6                                               |
| P2                            | 4.1±0.3                                               |
| P3                            | 3.6±0.3                                               |
| P4                            | 3.8±0.3                                               |
| w/o catechol                  |                                                       |
| P5                            | 0 <sup>c)</sup>                                       |
| P6                            | 0 <sup>c)</sup>                                       |
| P7                            | 0 <sup>c)</sup>                                       |
| P8                            | 0 <sup>c)</sup>                                       |

a) The PBS solution was incubated with an untreated (control) and polymer-coated glass slides; b) Untreated glass slide; c) No viable cell in solution was detected in the assay condition.

### S.8. $^1\text{H}$ NMR characterization of leached polymers

**Experimental procedure.** The polymer-coated glass slides were incubated with 1 mL of  $\text{D}_2\text{O}$  in a sterile 15 mL Falcon tube at  $37^\circ\text{C}$  with orbital rotation at 200 rpm for 1 hour. The  $\text{D}_2\text{O}$  solution was collected for  $^1\text{H}$  NMR measurement.

**Results.** To identify the leached polymers, we examined  $^1\text{H}$  NMR spectra of the polymers. The coating was incubated in deuterium oxide ( $\text{D}_2\text{O}$ ), and  $^1\text{H}$  NMR spectra of leached compounds in  $\text{D}_2\text{O}$  solutions were measured. The P5 and P6 polymers, which contain high % of MEA, showed small broad peaks (Figs. S1 and S2), and no detectable peaks were found in the spectra for the coatings of P7 and P8 containing high DMAEMAC<sub>12</sub> contents (Fig. S2). However, the residues after removing  $\text{D}_2\text{O}$  was dissolved in methanol-d<sub>4</sub> and displayed distinctive peaks in the NMR spectra (Figs. S1 and S3). These results indicate that the polymers P5-8 without DMA are released from the surfaces and are likely to aggregate in water. The NMR spectra also indicate that no or much fewer amounts of polymers were released from the coatings P1-4 as compared to the polymers P5-P8.

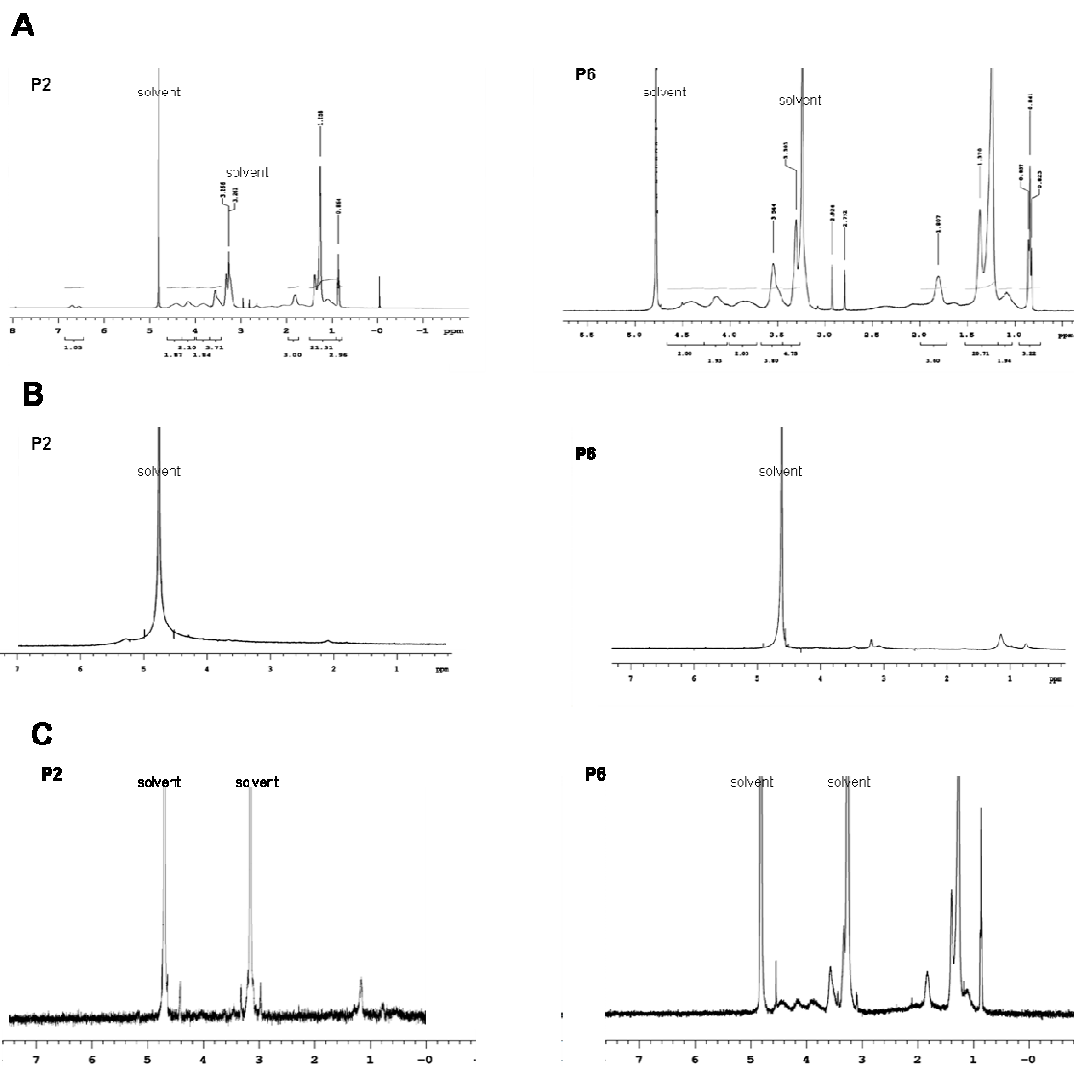

**Figure S2.**  $^1\text{H}$  NMR spectra of polymers P2 and P6. (A) Polymers before coatings ( $\text{CD}_3\text{OD}$ ), (B)  $\text{D}_2\text{O}$  solutions incubated with coatings of P2 and P6, and (C) residues in  $\text{CD}_3\text{OD}$  after removing  $\text{D}_2\text{O}$  solutions.

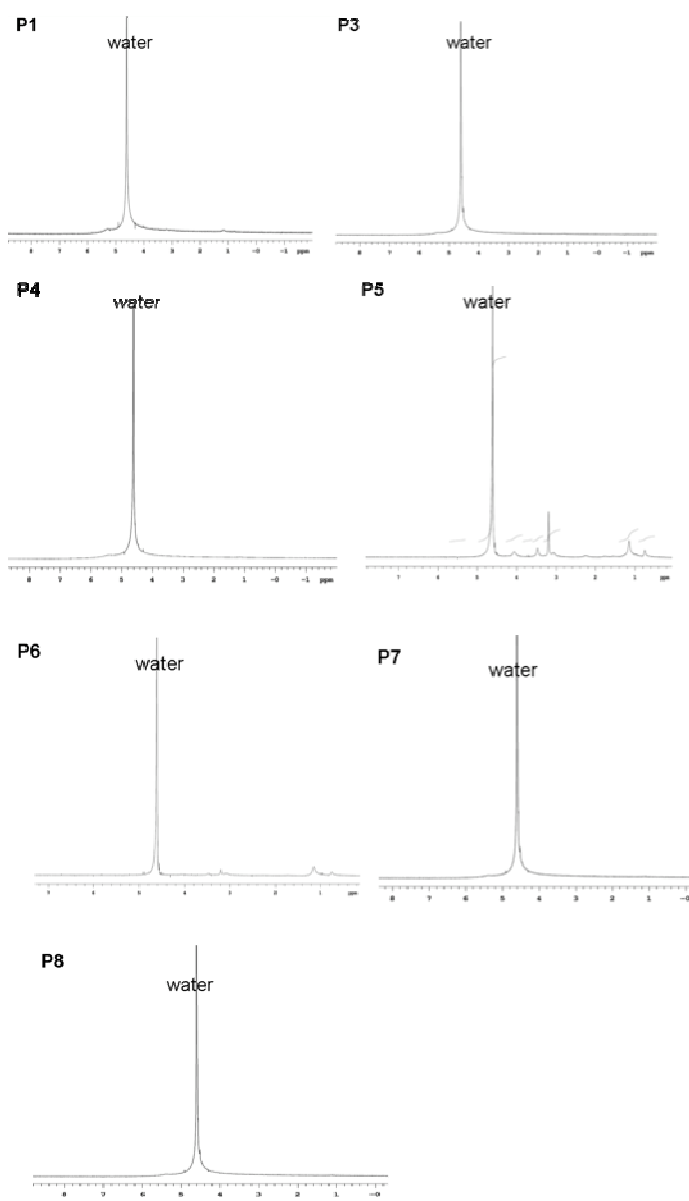

**Figure S3.**  $^1\text{H}$  NMR spectra of  $\text{D}_2\text{O}$  solutions incubated with coatings.

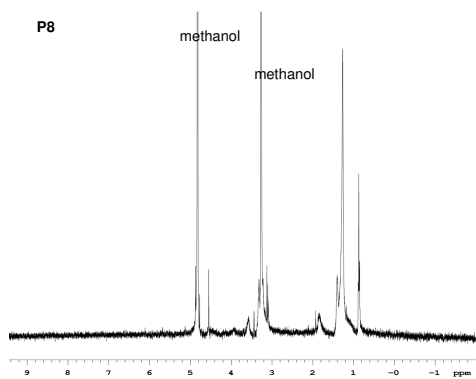

**Figure S4.** <sup>1</sup>H NMR spectra of residues in CD<sub>3</sub>OD after removing D<sub>2</sub>O solutions incubated with P8 coating.

### S. 9. Surface killing ability

To determine the maximum antimicrobial capacity of the P2 and P3 coatings in terms of the number of bacterial cells, we further tested the surfaces with the increased numbers of *E. coli* cells. The P2 and P3 coatings showed complete killing of *E. coli* cells up to  $1.2 \times 10^8$  and  $1.2 \times 10^7$  cfu/cm<sup>2</sup>, respectively (Table S4). Above these bacterial concentrations, these coatings reduced only fraction of viable cells. This might be due to that, above these bacterial concentrations, the adhesion of a large number of *E. coli* cells likely saturated the surfaces, effectively shielding the antimicrobial activity of polymer chains.

**Table S4.** Surface killing ability of polymers P2 and P3

| Polymer coatings | Number of viable <i>E. coli</i> cells (cfu/mL) |                   |
|------------------|------------------------------------------------|-------------------|
|                  | Control                                        | Coatings          |
| P2               | $3.7 \times 10^6$                              | 0 <sup>a)</sup>   |
| P2               | $1.2 \times 10^7$                              | 0 <sup>a)</sup>   |
| P2               | $1.2 \times 10^8$                              | 0 <sup>a)</sup>   |
| P2               | $1.0 \times 10^9$                              | $8.0 \times 10^8$ |
| P3               | $3.7 \times 10^6$                              | 0 <sup>a)</sup>   |
| P3               | $1.2 \times 10^7$                              | 0 <sup>a)</sup>   |
| P3               | $1.2 \times 10^8$                              | $4.7 \times 10^8$ |

a) No viable cell was detected in the assay condition.

### S.9. Determination of zone of inhibition

The coated slides were placed on the top of agar plates, which were pre-spread with 100 µl of overnight grown culture of *E.coli* or *S. aureus*. The agar plates were incubated at 37°C overnight to determine the size of zones of inhibition of bacterial growth caused by any leachables from the coatings.

### References

1. Lee, H.; Lee, B. P.; Messersmith, P. B. *Nature* **2007**, *448* (7151), 338(4).
2. Ravikumar, T.; Murata, H.; Koepsel, R. R.; Russell, A. J. *Biomacromolecules* **2006**, *7* (10), 2762-2769.

3. E2149-2101. *In: Annual Book of ASTM Standard 2002. International, A. Ed., West Conshohocken, PA, 1597p.*
4. Murata, H.; Koepsel, R. R.; Matyjaszewski, K.; Russell, A. J. *Biomaterials* **2007**, 28 (32), 4870-4879.
